# Supplementary material for: Preparation and characterization of bisphenolato magnesium derivatives: an efficient catalyst for the ring-opening polymerization of ε-caprolactone and L-lactide
Source: Royal Society of Chemistry journal article supplement (doi:10.1039/b912443h), 2009-01-01
Supplement: b912443h.pdf [file b912443h.pdf]

## Supporting Information

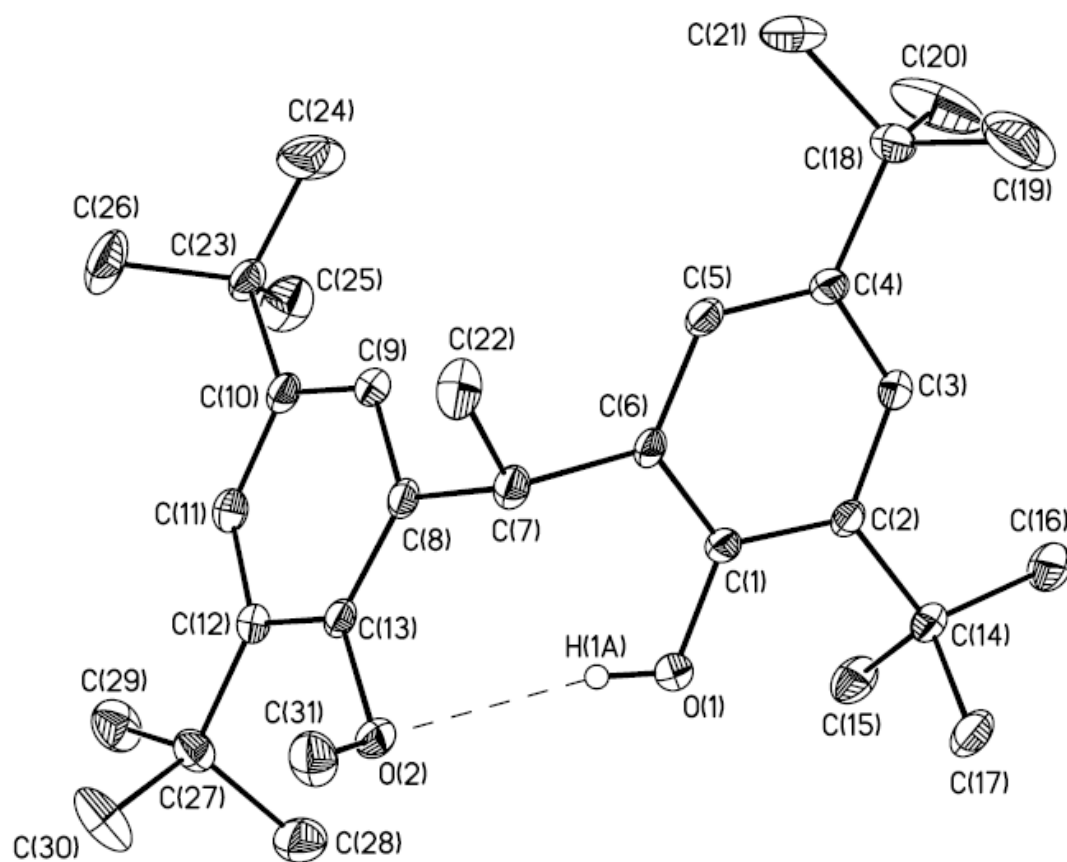

**Figure S1.** Molecular structure of **1** as 20% ellipsoids, and all of the hydrogen atoms are omitted for clarity.

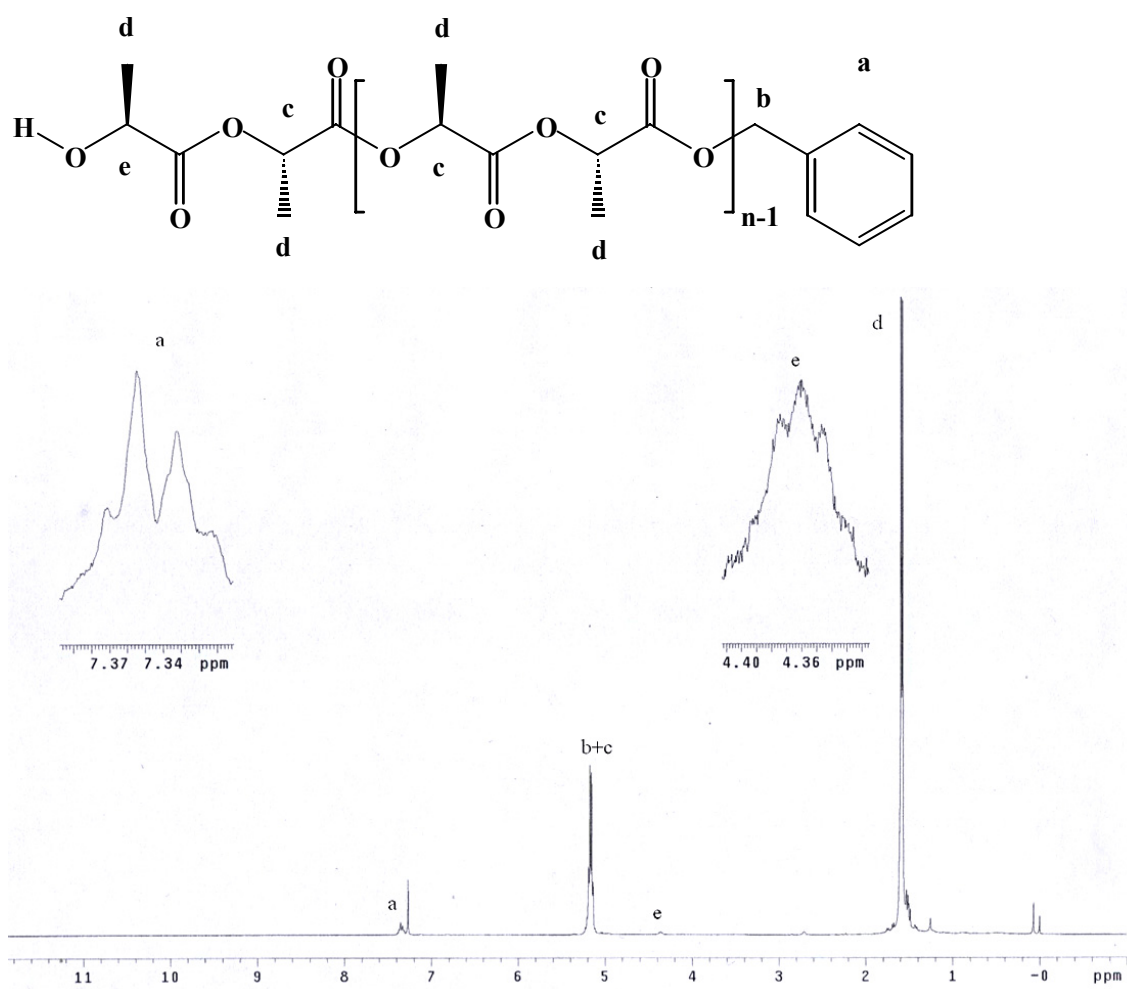

**Figure S2.**  $^1\text{H}$  NMR spectrum of PLLA-50 in  $\text{CDCl}_3$ .
